# Supplementary material for: ELISA-based detection of fresh and frozen–thawed lamb meat: a promising analytical approach for meat authentication
Source: Royal Society of Chemistry journal article supplement (doi:10.1039/d4ay00874j), 2024-01-01
Supplement: d4ay00874j1.xlsx [file d4ay00874j1.xlsx]

## Sheet: Sheet1
ELISA reading for chilled and frozen thawed meat samples
												ROC curve
						% positivity						Variable	PP%
Sl No	Sample ID	Sample Status (+/-)	OD1	OD2	Mean OD	PP%	Designation	0= chilled	1=Frozen-thawed			Classification variable	Designation
	Positive control	Positive	3.169	3.007	3.088	100	1
	Negative control	Negative	0.455	0.513	0.484	15.6736	0					Sample size	112
1	Buff_rft1_1	Positive	2.46	2.49	2.475	80.149	1					Positive group a	72 (64.29%)
2	Buff_rft1_2	Positive	2.34	2.39	2.365	76.5868	1					Negative group b	40 (35.71%)
3	Buff_rft1_3	Positive	2.52	2.59	2.555	82.7396	1					a Designation = 1
4	Buff_rft1_4	Positive	1.87	1.84	1.855	60.0712	1					b Designation = 0
5	Buff_rft1_5	Positive	2.55	2.52	2.535	82.092	1
6	Buff_rft1_6	Positive	1.98	1.89	1.935	62.6619	1					Disease prevalence (%)	unknown
7	Buff_rft1_7	Positive	1.855	1.821	1.838	59.5207	1
8	Buff_rft1_8	Positive	2.25	2.24	2.245	72.7008	1					Area under the ROC curve (AUC)
9	Buff_rft1_9	Positive	2.54	2.62	2.58	83.5492	1					Area under the ROC curve (AUC)	0.978
10	Buff_rft1_10	Positive	2.152	2.102	2.127	68.8795	1					Standard Error a	0.0154
11	Buff_rft1_11	Positive	2.44	2.36	2.4	77.7202	1					95% Confidence interval b	0.931 to 0.997
12	Buff_rft1_12	Positive	1.21	1.25	1.23	39.8316	1					z statistic	30.976
13	Buff_fresh_1	Negative	0.45	0.465	0.4575	14.8154	0					Significance level P (Area=0.5)	<0.0001
14	Buff_fresh_2	Negative	2.698	2.689	2.6935	87.2247	0					a Hanley & McNeil, 1982
15	Buff_fresh_3	Negative	0.992	0.981	0.9865	31.9462	0					b Binomial exact
16	Buff_fresh_4	Negative	0.855	0.846	0.8505	27.5421	0
17	Buff_fresh_5	Negative	0.802	0.799	0.8005	25.9229	0					Youden index
18	Buff_fresh_6	Negative	0.598	0.587	0.5925	19.1872	0					Youden index J	0.9083
	Positive control		3.169	3.007	3.088	100	1					Associated criterion	>52.752
	Negative control		0.532	0.567	0.5495	17.7947	0					Sensitivity	95.83
19	Buff_rft2_1	Positive	2.913	2.869	2.891	87.9258	1					Specificity	95
20	Buff_rft2_2	Positive	2.838	2.798	2.818	85.7056	1
21	Buff_rft2_3	Positive	2.768	2.722	2.745	83.4854	1					Criterion values and coordinates of the ROC curve [Show]
22	Buff_rft2_4	Positive	2.874	2.879	2.8765	87.4848	1
23	Buff_rft2_5	Positive	2.82	2.73	2.775	84.3978	1					Criterion values and coordinates of the ROC curve [Hide]
24	Buff_rft2_6	Positive	2.63	2.593	2.6115	79.4252	1					Criterion	Sensitivity	95% CI	Specificity	95% CI	+LR	-LR
25	Buff_rft2_7	Positive	3.038	3.045	3.0415	92.503	1					≥7.056	100	95.0 - 100.0	0	0.0 - 8.8	1
26	Buff_rft2_8	Positive	1.56	1.669	1.6145	49.1028	1					>31.946	100	95.0 - 100.0	85	70.2 - 94.3	6.67	0
27	Buff_rft2_9	Positive	3.071	3.225	3.148	95.7421	1					>44.717	97.22	90.3 - 99.7	85	70.2 - 94.3	6.48	0.033
28	Buff_rft2_10	Positive	3.154	3.158	3.156	95.9854	1					>48.188	97.22	90.3 - 99.7	87.5	73.2 - 95.8	7.78	0.032
29	Buff_rft2_11	Positive	3.007	3.216	3.1115	94.632	1					>49.103	95.83	88.3 - 99.1	87.5	73.2 - 95.8	7.67	0.048
30	Buff_rft2_12	Positive	3.135	3.235	3.185	96.8674	1					>52.752	95.83	88.3 - 99.1	95	83.1 - 99.4	19.17	0.044
31	Buff_fresh_7	Negative	0.597	0.589	0.593	18.0353	0					>68.88	88.89	79.3 - 95.1	95	83.1 - 99.4	17.78	0.12
32	Buff_fresh_8	Negative	0.409	0.501	0.455	13.8382	0					>69.768	88.89	79.3 - 95.1	97.5	86.8 - 99.9	35.56	0.11
33	Buff_fresh_9	Negative	1.708	1.719	1.7135	52.1137	0					>85.706	40.28	28.9 - 52.5	97.5	86.8 - 99.9	16.11	0.61
34	Buff_fresh_10	Negative	1.733	1.736	1.7345	52.7524	0					>87.225	40.28	28.9 - 52.5	100	91.2 - 100.0		0.6
35	Buff_fresh_11	Negative	0.328	0.334	0.331	10.0669	0					>161.222	0	0.0 - 5.0	100	91.2 - 100.0		1
36	Buff_fresh_12	Negative	0.228	0.236	0.232	7.05596	0
	Positive control		2.165	2.198	2.1815	100	1					Friday, May 3, 2024 16:33
	Negative control		0.599	0.512	0.5555	25.4641	0					MedCalc® Statistical Software version 22.023 (MedCalc Software Ltd, Ostend, Belgium; https://www.medcalc.org; 2024)
37	Buff_rft1_13	Positive	2.003	2.125	2.064	94.6138	1
38	Buff_rft1_14	Positive	2.896	2.002	2.449	112.262	1
39	Buff_rft1_15	Positive	2.962	2.877	2.9195	133.83	1
40	Buff_rft1_16	Positive	2.756	2.896	2.826	129.544	1
41	Buff_rft1_17	Positive	0.997	0.954	0.9755	44.7169	1
42	Buff_rft1_18	Positive	3.086	3.125	3.1055	142.356	1
43	Buff_rft1_19	Positive	2.459	2.455	2.457	112.629	1
44	Buff_rft1_20	Positive	2.363	2.311	2.337	107.128	1
45	Buff_rft1_21	Positive	2.346	2.325	2.3355	107.059	1
46	Buff_rft1_22	Positive	2.337	2.36	2.3485	107.655	1
47	Buff_rft1_23	Positive	2.25	2.366	2.308	105.799	1
48	Buff_rft1_24	Positive	2.353	2.358	2.3555	107.976	1
49	Buff_rft1_25	Positive	2.505	2.698	2.6015	119.253	1
50	Buff_fresh_13	Negative	0.487	0.481	0.484	22.1866	0
51	Buff_fresh_14	Negative	0.504	0.516	0.51	23.3784	0
52	Buff_fresh_15	Negative	0.515	0.523	0.519	23.791	0
53	Buff_fresh_16	Negative	0.601	0.596	0.5985	27.4353	0
54	Buff_fresh_17	Negative	1.074	1.088	1.081	49.5531	0
	Positive control		3.035	3.118	3.0765	100	1
	Negative control		0.589	0.592	0.5905	19.1939	0
55	Buff_rft1_26	Positive	2.515	2.612	2.5635	83.3252	1
56	Buff_rft1_27	Positive	2.358	2.361	2.3595	76.6943	1
57	Buff_rft1_28	Positive	2.287	2.321	2.304	74.8903	1
58	Buff_rft1_29	Positive	2.416	2.425	2.4205	78.6771	1
59	Buff_rft1_30	Positive	2.242	2.312	2.277	74.0127	1
60	Buff_rft1_31	Positive	2.392	2.325	2.3585	76.6618	1
61	Buff_rft1_32	Positive	2.36	2.413	2.3865	77.5719	1
62	Buff_rft1_33	Positive	2.376	2.4001	2.38805	77.6223	1
63	Buff_rft1_34	Positive	2.417	2.589	2.503	81.3587	1
64	Buff_rft1_35	Positive	2.458	2.569	2.5135	81.7	1
65	Buff_rft1_36	Positive	2.345	2.412	2.3785	77.3119	1
66	Buff_rft1_37	Positive	2.463	2.501	2.482	80.6761	1
67	Buff_rft1_38	Positive	2.446	2.466	2.456	79.831	1
68	Buff_rft1_39	Positive	2.479	2.325	2.402	78.0757	1
69	Buff_rft1_40	Positive	2.424	2.326	2.375	77.1981	1
70	Buff_rft1_41	Positive	2.478	2.489	2.4835	80.7248	1
71	Buff_rft1_42	Positive	2.363	2.365	2.364	76.8406	1
72	Buff_rft1_43	Positive	2.508	2.632	2.57	83.5365	1
73	Buff_fresh_18	Negative	0.587	0.502	0.5445	17.6987	0
74	Buff_fresh_19	Negative	0.504	0.495	0.4995	16.236	0
75	Buff_fresh_20	Negative	0.415	0.389	0.402	13.0668	0
76	Buff_fresh_21	Negative	0.501	0.475	0.488	15.8622	0
77	Buff_fresh_22	Negative	0.474	0.457	0.4655	15.1308	0
78	Buff_fresh_23	Negative	1.507	1.458	1.4825	48.1879	0
	Positive control		2.835	2.805	2.82	100	1
	Negative control		0.49	0.52	0.505	17.9078	0
79	Buff_rft2_13	Positive	2.02	2.065	2.0425	72.4291	1
80	Buff_rft2_14	Positive	2.459	2.489	2.474	87.7305	1
81	Buff_rft2_15	Positive	2.688	2.889	2.7885	98.883	1
82	Buff_rft2_16	Positive	2.09	2.08	2.085	73.9362	1
83	Buff_rft2_17	Positive	2.201	2.32	2.2605	80.1596	1
84	Buff_fresh_24	Negative	0.332	0.332	0.332	11.773	0
85	Buff_fresh_25	Negative	0.475	0.421	0.448	15.8865	0
86	Buff_fresh_26	Negative	0.387	0.332	0.3595	12.7482	0
87	Buff_fresh_27	Negative	0.504	0.455	0.4795	17.0035	0
88	Buff_fresh_28	Negative	0.415	0.768	0.5915	20.9752	0
89	Buff_fresh_29	Negative	0.901	0.889	0.895	31.7376	0
90	Buff_fresh_30	Negative	0.674	0.669	0.6715	23.8121	0
	Positive control		2.235	2.118	2.1765	100	1
	Negative control		0.595	0.632	0.6135	28.1875	0
91	Buff_rft1_44	Positive	1.731	1.802	1.7665	81.1624	1
92	Buff_rft1_45	Positive	2.307	2.321	2.314	106.317	1
93	Buff_rft1_46	Positive	1.793	1.671	1.732	79.5773	1
94	Buff_rft1_47	Positive	1.274	1.271	1.2725	58.4654	1
95	Buff_rft1_48	Positive	1.671	1.783	1.727	79.3476	1
96	Buff_rft2_18	Positive	3.659	3.359	3.509	161.222	1
97	Buff_fresh_31	Negative	0.498	0.521	0.5095	23.4091	0
98	Buff_fresh_32	Negative	1.526	1.511	1.5185	69.768	0
99	Buff_fresh_33	Negative	0.498	0.486	0.492	22.6051	0
100	Buff_fresh_34	Negative	0.536	0.563	0.5495	25.247	0
